# Supplementary material for: Multiple Imputation by Fully Conditional Specification for Dealing with Missing Data in a Large Epidemiologic Study
Source: PubMed Central journal article supplement — Int J Stat Med Res. Author manuscript; Available in PMC 2016 Jul 14. (PMC4945131; doi:10.6000/1929-6029.2015.04.03.7), 2015-08-19
Supplement: NIHMS795806-supplement.pdf [file NIHMS795806-supplement.pdf]

## SUPPORTING MATERIALS

The general SAS coding procedure for PROC MI using FCS statement is included. Tables 4 and 5 for FFP and Platelet utilization by Diagnosis (ICD category), Age and Gender are also included.

Supporting materials for “Multiple Imputation by Fully Conditional Specification for Dealing with Missing Data in a Large Epidemiologic Study” by authors Liu and De.

### EXAMPLE SAS CODE FOR PROC MI USING FCS STATEMENT

```
PROC MI      DATA=DATAIN MINIMUM=MINVALUE MAXIMUM=MAXVALUE ROUND=1
            NIMPUTE=m OUT=DATAOUT;
            CLASS Y1 Y2 Y3 Y4;
            FCS PLOTS=TRACE
                REG(X1/details)
                LOGISTIC(Y1/details);
            VAR X1-X3 Y1-Y4;

RUN;
```

MINIMUM or MAXIMUM is the command for specifying the bound value to be imputed for the variables, where you can specify a number for all the variables being imputed or only for certain ones. ROUND is to round the imputed values. NIMPUTE is to select the number of imputations ( $m$ ). X1-X3 and Y1-Y4 represent the continuous and categorical variables correspondingly. The FCS approach indicates what specific model to be used given the type of variable imputed. PLOTS=TRACE will display trace plots for worst linear function, variable means, variable variances, and covariances of variables. VAR statement shows the desired variables used in the imputation model.

**Table 4: FFP Utilization by Diagnosis (ICD Category), Age and Gender: A. FCS MI; B. CCA.**

| A. FCS MI<br>ICD category                                                                                        | Male       |           |             |             |           |           | Female     |           |             |             |           |           | Totals       |       |
|------------------------------------------------------------------------------------------------------------------|------------|-----------|-------------|-------------|-----------|-----------|------------|-----------|-------------|-------------|-----------|-----------|--------------|-------|
|                                                                                                                  | 0-14 years |           | 15-49 years |             | 50+ years |           | 0-14 years |           | 15-49 years |             | 50+ years |           |              |       |
|                                                                                                                  | %          | 95%CI     | %           | 95%CI       | %         | 95%CI     | %          | 95%CI     | %           | 95%CI       | %         | 95%CI     | n<br>(units) | %     |
| K. Gastrointestinal (K20-K93)                                                                                    | 0.4        | (0.2,0.6) | 7.3         | (6.4,8.2)   | 5.7       | (4.6,6.8) | 0.3        | (0.1,0.4) | 5.9         | (4.8,7.1)   | 3.5       | (2.9,4)   | 2,251        | 23.1  |
| D. Diseases of the blood and blood-forming organs and certain disorders involving the immune mechanism (D50-D89) | 1.1        | (0.9,1.4) | 4.1         | (3.6,4.6)   | 1.7       | (1.3,2.1) | 0.8        | (0.5,1.1) | 5.7         | (5.1,6.3)   | 1.8       | (1.5,2.2) | 1,493        | 15.3  |
| O. Pregnancy (O00-O99)                                                                                           | 0          | (0,0)     | 0           | (0,0)       | 0         | (0,0)     | 0.4        | (0.2,0.6) | 10.8        | (10.1,11.5) | 0.4       | (0.2,0.6) | 1,130        | 11.6  |
| Surgical <sup>a</sup>                                                                                            | 0.3        | (0.1,0.5) | 3.4         | (2.5,4.3)   | 2.3       | (1.7,3)   | 0.3        | (0.2,0.5) | 3.4         | (2.7,4.1)   | 1.5       | (1.1,2)   | 1,099        | 11.3  |
| All others                                                                                                       | 3          | (2.6,3.4) | 12.2        | (11.1,13.4) | 5.9       | (5,6.9)   | 1.8        | (1.4,2.2) | 12.4        | (11.3,13.5) | 3.4       | (2.7,4)   | 3,778        | 38.7  |
|                                                                                                                  |            |           |             |             |           |           |            |           |             |             |           |           | 9,751        | 100.0 |

| B. CCA                                                                                                           | Male       |             |           | Female     |             |           | Totals    |       |
|------------------------------------------------------------------------------------------------------------------|------------|-------------|-----------|------------|-------------|-----------|-----------|-------|
|                                                                                                                  | 0-14 years | 15-49 years | 50+ years | 0-14 years | 15-49 years | 50+ years | n (units) | %     |
|                                                                                                                  | %          | %           | %         | %          | %           | %         |           |       |
| K. Gastrointestinal (K20-K93)                                                                                    | 0.3        | 6.0         | 4.1       | 0.3        | 4.3         | 2.5       | 1,016     | 17.5  |
| D. Diseases of the blood and blood-forming organs and certain disorders involving the immune mechanism (D50-D89) | 1.2        | 4.2         | 1.7       | 0.5        | 6.1         | 2.0       | 959       | 15.7  |
| O. Pregnancy (O00-O99)                                                                                           | 0          | 0           | 0         | 0.0        | 15.1        | 0.2       | 932       | 15.3  |
| Surgical <sup>a</sup>                                                                                            | 0.3        | 3.0         | 2.0       | 0.4        | 3.1         | 1.3       | 614       | 10.0  |
| All others                                                                                                       | 3.1        | 13.4        | 6.5       | 1.6        | 13.4        | 3.3       | 2,512     | 41.3  |
|                                                                                                                  |            |             |           |            |             |           | 6,082     | 100.0 |

<sup>a</sup> The "Surgical" category includes ICD-09CM codes: 01.0-05.9; 08.0-16.99; 28.0-28.99; 31.0-31.99; 41.1-41.5; 43.0-46.99; 51.0-51.99; 53.0-55.99; 57.0-57.99; 60.0-60.99; 65.0-71.9; 76.0-84.99; 86.0-86.99.

**Table 5: Platelet Utilization by Diagnosis (ICD Category), Age and Gender: A. FCS MI; B. CCA**

| A. FCS MI                                                                                                        | Male       |            |             |           |           |           | Female     |           |             |            |           |           | Totals    |       |
|------------------------------------------------------------------------------------------------------------------|------------|------------|-------------|-----------|-----------|-----------|------------|-----------|-------------|------------|-----------|-----------|-----------|-------|
|                                                                                                                  | 0-14 years |            | 15-49 years |           | 50+ years |           | 0-14 years |           | 15-49 years |            | 50+ years |           | n (units) | %     |
|                                                                                                                  | %          | 95%CI      | %           | 95%CI     | %         | 95%CI     | %          | 95%CI     | %           | 95%CI      |           |           |           |       |
| C. Malignant Neoplasms (C00-C97)                                                                                 | 10.8       | (9.6,11.9) | 8.0         | (6.9,9.1) | 2.9       | (2.2,3.6) | 6.6        | (5.7,7.6) | 7.6         | (6.4,8.8)  | 2.2       | (1.6,2.8) | 1,135     | 38.1  |
| D. Diseases of the blood and blood-forming organs and certain disorders involving the immune mechanism (D50-D89) | 3.2        | (2.4,3.9)  | 8.8         | (7.7,9.8) | 2         | (1.5,2.6) | 3.7        | (2.9,4.4) | 9.6         | (8.4,10.7) | 1.9       | (1.4,2.5) | 868       | 29.1  |
| O. Pregnancy (O00-O99)                                                                                           | 0          | (0,0)      | 0           | (0,0)     | 0         | (0,0)     | 0.3        | (0,0.6)   | 8.3         | (7.3,9.3)  | 0.1       | (0,0.3)   | 260       | 8.7   |
| A/B. Infectious Disease (A00-B99)                                                                                | 0.6        | (0.3,0.9)  | 1.9         | (1.4,2.4) | 0.5       | (0.2,0.8) | 0.7        | (0.4,1)   | 1.8         | (1.3,2.3)  | 0.2       | (0,0.4)   | 170       | 5.7   |
| All Others                                                                                                       | 2.8        | (2.2,3.4)  | 4.3         | (3.6,5.1) | 2.6       | (1.9,3.2) | 2.1        | (1.5,2.6) | 4.6         | (3.8,5.4)  | 2         | (1.4,2.5) | 545       | 18.3  |
|                                                                                                                  |            |            |             |           |           |           |            |           |             |            |           |           | 2,978     | 100.0 |

  

| B. CCA                                                                                                           | Male       |             |           | Female     |             |           | Totals    |       |
|------------------------------------------------------------------------------------------------------------------|------------|-------------|-----------|------------|-------------|-----------|-----------|-------|
|                                                                                                                  | 0-14 years | 15-49 years | 50+ years | 0-14 years | 15-49 years | 50+ years | n (units) | %     |
|                                                                                                                  | %          | %           | %         | %          | %           | %         |           |       |
| C. Malignant Neoplasms (C00-C97)                                                                                 | 11.4       | 6.0         | 2.5       | 6.5        | 5.3         | 1.7       | 759       | 33.4  |
| D. Diseases of the blood and blood-forming organs and certain disorders involving the immune mechanism (D50-D89) | 3.0        | 9.6         | 2.3       | 3.8        | 10.5        | 2.1       | 709       | 31.2  |
| O. Pregnancy (O00-O99)                                                                                           | 0          | 0           | 0         | 0.0        | 10.2        | 0.1       | 233       | 10.2  |
| A/B. Infectious Disease (A00-B99)                                                                                | 0.4        | 1.9         | 0.5       | 0.7        | 1.9         | 0.2       | 128       | 5.6   |
| All Others                                                                                                       | 3.0        | 4.5         | 2.8       | 1.9        | 4.8         | 2.2       | 437       | 19.2  |
|                                                                                                                  |            |             |           |            |             |           | 2,266     | 100.0 |
